# Supplementary material for: The dirty side of clean energy: Lithium ion batteries as a source of PFAS in the environment
Source: Research Square preprint supplement (doi:10.21203/rs.3.rs-3150504/v1), 2023-08-01
Supplement: Supplementary file 1 [file 7e4c580f47177ef43624ec00.docx]

**Materials and Methods**

*Materials*

Standards of all measured PFAS and their isotopically labeled standards for use as internal standards (IS, **Table S1**) were purchased from Wellington laboratories with the exception of standards for bis perfluoroalkyl sulfonimides (bisFASIs), which were purchased from Sigma Aldrich and branched perfluoroalkyl ether acid standards which were provided by Chemours. All standards were prepared in liquid chromatography mass spectrometry (LC-MS) grade methanol (MeOH; Honeywell). Potassium persulfate (Sigma-Aldrich), sodium hydroxide (Fisher Scientific), ammonium acetate (BRAND), Envi-carbTM (envicarb; Supelco), ammonium hydroxide (BRAND), hydrochloric acid (HCl; Thermo Fisher Scientific), and acetic acid (Honeywell) were acquired from Fisher scientific and VWR, USA.

*Sample Collection*

In general samples were collected in rivers (Mississippi, Ohio, Tennesse, and Scheldt Rivers) and streams (L'Arias and L'Avene) that are or are suspected to be receiving outfall discharges from major fluorochemical manufacturers (e.g. 3M, Arkema, and Solvay) and in the surrounding regions. In total, 31 surface water samples, 1 snow sample, 5 tap water samples, 2 groundwater samples, 4 sediment samples, and 4 soil samples were collected in January and June 2022 from 31 locations near Cottage Grove, MN (**Table S2**). Additionally, a total of 24 surface water samples, 4 sediment samples, and 8 soil samples were collected from 32 locations in Paducah, KY and Louisville, KY (**Table S3**). Finally, a total of 21 surface water samples, 11 sediment samples, 9 soil samples, and 1 foam sample were collected from 25 locations in Antwerp, Belgium and Salindres, France in October 2022 (**Table S4**).

It was necessary to install ice cores at all MN location in Pool 2 of the Mississippi River prior to collection of surface water samples. A 8" diameter ice auger was used to core through ice at all locations. Because of subfreezing temperatures, the auger could not be cleaned between locations, but as described below, samples were collected well below the water surface. Additionally, the most contaminated sample locations were completed last. All project surface water samples were collected into new high-density polyethylene (HDPE) containers that were triple rinsed with LC-MS grade MeOH and air dried, and samplers were wearing clean, nitrile gloves that were changed between each sampling location. Surface water and deep water sediment samples (i.e., that couldn't be reached by trowel) were collected using an extendable dipper rod attached to a HDPE sample cup. All surface water samples collected in January 2022 were collected ~3ft below the water surface to minimize potential for cross-contamination due to the ice auger. In all sampling events, the sample cup was triple rinsed with water from that sample location prior to sample collection. The snow sample was scooped directly into a clean HDPE container. Soil samples and shallow sediment samples were collected with a stainless steel trowel that was triple rinsed with MeOH and DI water between sampling locations. Tap water and groundwater (i.e., a private well) samples were collected from the taps of the homes they served directly into the sampling container. Samples were stored on ice and shipped to laboratories at Texas Tech and Duke Universities. Sample amounts remaining after preparation for analysis were frozen as archives. Each sampling trip also included collection of duplicates and field blanks, as discussed in the results.

*Soil and sediment extraction*

Soil and sediment extraction was completed in accordance with existing methods50,51. Briefly, 0.5-1.5 g (wet weight) of soil or sediment was weighed into 50 mL polypropylene (PP) centrifuge tubes and spiked with 2-9.1 ng of each IS (**Table S1**). A 7 mL aliquot of basic MeOH (1% [V/V] ammonium hydroxide in MeOH) was added to the PP tube, vortexed (30s), placed in a heated sonication bath (60 °C, 1hr, VWR, 97044-006), and placed on a horizontal shaker for two hours. Samples were then centrifuged (5000 rpm, 20 min), and the supernatant was transferred into a clean, 20 mL glass scintillation vial. The extraction steps were repeated twice for a total of three rounds, and the combined supernatant was evaporated under nitrogen (Organomation Associates Inc. N24EVAP, Berlin, MA), and reconstituted in 700-1400 µL acidic methanol (1% [V/V] acetic acid in methanol). The extract was transferred to a microcentrifuge tube containing 20 - 40 mg envicarb for clean-up. The microcentrifuge tube was vortexed (30 sec) and centrifuged (14700 rpm for 30 minutes). An aliquot of 29.75-119 µL of the supernatant was transferred to an autosampler vial and amended with 731-820.20 µL of LC-MS grade methanol and 840 µL ultrapure water to achieve a final vial composition of 50% water and 50% methanol, containing 100-400 ng/L of each IS.

*Aqueous sample preparation*

Aqueous samples were prepared by serial dilution for direct injection. Samples were diluted 1-8x in autosampler vials with ultrapure water to which an equal volume of LC-MS grade MeOH containing the IS mixture was added for a final dilution of 2-16x containing 200 ng/L of each IS.

*Battery extraction*

A Soxhlet extraction technique was used for LiBs. Briefly, a 33mm x 94mm disposable thimble was positioned in the Soxhlet apparatus. The apparatus was then fitted with a condenser and placed on 250 mL boiling flask containing ~ 150 mL methanol and 3-4 clean boiling stones. The boiling flask was heated for ~6 hours using heating a mantle connected to a variable autotransformer. After 6 hours, a membrane from a disassembled LiB was carefully placed in thimble, and solvent in the flask was replaced with ~ 180 mL clean methanol. The LiB case was rinsed 3x with methanol (~ 5mL per rinse) which was poured into the thimble, and batteries were then extracted for 24 hours. After Extraction, the solvent was evaporated to ~ 30 mL using vacuum rotary evaporator and transferred to 50 mL polypropylene tube. The extracts then were concentrated to ~1 mL under nitrogen and bring sample volume to 10 mL by adding clean methanol. For analysis 10mL of each extract was transferred to an autosampler vial containing 270 mL methanol and 700 mL deionized water. Each sample was spiked with 25 ng/L (20 µL of 1.25 µg/L in 1000 µL) of IS prior to analysis.

*HPLC-QTOF-MS analysis (TTU)*

Methods are the same as those used by the authors in previous work50,51. The chromatographic separation was performed on a C18 analytical column (Gemini®, 3 uM , 100 X 3 mm ID, Phenomenex, CA, USA ) coupled with a guard column (Gemini®, C18 4 x 2.0 mm ID, Phenomenex, CA, USA) with a SCIEX Exion LC high pressure liquid chromatography (HPLC) pump. A delay column (Luna®, 5 µm, C18, 30 x 3mm, Phenomenex, CA, USA) was installed between mobile phase mixer and sample injector to separate background contamination that may come from solvent reservoir tubing and nonreplaceable PTFE pump parts. The C18 and guard columns were maintained at 40oC throughout the run. The aqueous phase consisted of 20 mM ammonium acetate solution (A), and the organic phase was 100% methanol (B). 500 µL of sample was injected during the analysis. The mobile phase flow rate was maintained at 600 µL/min throughout the run, and the composition was ramped from 95% A to 35% A over the first minute, and further ramped to 5% A at 8 minutes, 1% to in next 0.1 minutes, held constant until 12.5 minutes, and at the end ramped to 95% A at 13.0 minutes and equilibrated the column for 3.5 minutes.

Analyses were performed on a quadrupole time of flight mass spectrometry (QTOF-MS) system (X500R, SCIEX, Framingham, MA, USA). Turbo ion spray was used as the ion source and maintained at 500° C during the sample acquisition with following conditions: ion spray voltage -4500 (v); curtain gas 30 (PSI); ion source gas 1 40 (PSI), ion source gas 2 60 (PSI). Collision activated dissociation (CAD) gas was maintained at 10 PSI. Ultra-pure nitrogen was used for source, exhaust, and CAD gases. PFAS in **Table S1** were monitored and analyzed using a MRMHR acquisition method.

*HPLC-MS/MS analysis (Duke)*

At Duke University, an analogous quantitative method was implemented on a Thermo TSQ Altis HPLC-triple quadrupole mass spectrometer (MS/MS) with minor modifications, Specifically, aqueous and organic phase contained 2 mM ammonium acetate and 0.1 % (V/V) acetic acid, sample injection volume was 50 µL and flow rate was maintained at 500 µL/min. The sheath gas, aux gas, sweep gas, ion transfer tube temperature, and vaporizer temperature were set to 50 arb, 10 arb, 1 arb, 325 °C, and 300 °C, respectively. For monitoring PFEAs, the sheath gas was 30 arb and the ion transfer tube temperature was 150 °C. This method monitored all PFAS in **Table S1** except 8Cl-PFOS, FDSA and n:x FTCA.

*HPLC-MS/MS analysis (NCSU)*

At North Carolina State University (NCSU), an analogous quantitative method was implemented on an Agilent Ultivo Triple Quadrupole LC/MS equipped with a 4.6 × 50 mm HPLC column (ZORBAX Eclipse Plus C18, 3.5µ, Agilent) using large volume (200 µL) injection. The column temperature was kept at 50°C. An additional Agilent ZORBAX Eclipse Plus C18 column was connected before the injector to separate any background PFAS contamination. Mobile phases were 5 mM ammonium acetate in deionized water (solvent A) and a mixture of water:methanol 5:95% by volume (solvent B) at a flow rate of 0.7 mL/min. The composition was ramped from 95% A to 0% A at 18 minute, held constant until 22 minute, further ramped to 95% A at 22.1 minutes and equilibrated for 6 minutes. Each sample was injected twice at high (400°C) and low (250°C) ion source temperature settings to maximize responses for the targeted PFAS based on a previous study52. This method was used to analyze all PFECAs and PFESAs (**Table S1**).

*Quality control*

IS recoveries were used to evaluate extraction efficiency and matrix effects during analysis. Internal standard recoveries in unknown samples were calculated relative to the average of IS peak areas in calibration standards**.** If IS recoveries were outside the acceptable range of (50-150%), target analyte concentrations were flagged. Peaks of IS and calibrants (target analytes) in unknown samples were only considered for further analysis if retention times were ±30 s of calibration standards, signal to noise ratios were greater than 10 and also at least 3X higher than the response in instrument blanks. Each analytical run consisted of 14 calibration standards (0.5-5000 ng/L), method blanks, instrument blanks, instrument sensitivity checks (ISCs, 0.5-10 ng/L), low concentration continuing calibration verification (CCV, 10 ng/L), and mid-point CCV (200 ng/L). All quality control samples except instrument blanks contained 200 ng/L of each IS. Vial composition of all quality control samples was the same as unknown samples.

ISCs were performed by running 0.5-10 ng/L standards immediately prior to unknown samples. The LOQ of an analyte was the lowest ISC where the calculated concentration was ±30% of true concentration or the concentration detected in the method blank, whichever was higher. CCV was performed by injecting a standard after every 10 unknown samples (alternating between 10 and 200 ng/L) and sample data were accepted only if CCVs were ±30% of true value. Calibration curves were fit with regression equations (R2>0.99) and used to quantify analytes in unknown samples. Every sample was quantified using an isotope dilution method, and concentrations of samples are reported as average of triplicates. Relative standard deviation (RSD) of replicates was calculated and presented as a measure of variability during the analysis.

*Daphnia magna* (*D. magna*) exposures

*D. magna* neonates (<24-h old) were obtained from Aquatic Biosystems (Ft Collins, CO), and to bis-FMeSI following a modified 48 h acute, static non-renewal design described in EPA-821-R-02-01253. Exposures were conducted on individual *D. magna* to allow accurate video recordings of organism swimming behavior. Exposure media was EPA moderately hard comprised of 18-MΩ water (ELGA PURELAB® flex 5, Woodridge, IL 60517, USA) containing 96 mg/L NaHCO3 (Sodium bicarbonate HPLC grade, 99%, Acros Organics, 446230010), 60 mg/L CaSO4, (Calcium sulfate dihydrate analytical grade, 98%, Acros Organics 225275000), 60 mg/L MgSO4 (Magnesium sulfate anhydrous 97%, Acros Organics 413485000), and 4 mg/L KCl2 (Potassium chloride analytical grade, 99%, Acros Organics, 196770010). Measured dilution water quality parameters were measured at exposure setup are listed below in **Table S6**. Exposure temperature, pH, conductivity, and dissolved oxygen were using a handheld HQ40d portable multimeter (Hach, CO, USA), while hardness and alkalinity were measured by titration (CHEMetrics, K-4520 Titrimetric Hardness and K-9810 Titrimetric Total Alkalinity). All experimental chambers were 100 ml polypropylene beakers pre-rinsed in triplicate with LC-MS-grade methanol. Ten *D. magna* were exposed individually to 0, 5, 10, 100, 1000 and 5000 ng/L bis-FMeSI. Individual exposures allowed measurement of swimming track density, swimming distance, time, and velocity. Test chambers were randomly assigned locations within an environmental test chamber maintained at 20 ± 1°C with a 16-h light 8-h dark cycle (Fisherbrand™ Isotemp™ BOD, retrofitted with timer controlled lighting).

Concentrations of bis-FMeSI were evaluated using LC-QTOF-MS methods described above. Both acute and sublethal swimming endpoints were evaluated using the same *D. magna* exposures. Acute endpoints included lethality and immobilization while swimming track density, swimming distance, time, and velocity were measure by recording each *D. magna* for 10 min ring stand based apparatus to ensure consistency. A UV-light was used to stimulate *D. magna* swimming behavior. And swimming behavior was recorded at 30 frames per second (fps). Raw mp4 data was processed using a frame by frame method with a post image processing script from the Open CV2 Library for Python M54. Briefly, videos were converted to sets of still images where *D. magna* are assigned X and Y reference coordinates that can be tracked relative to an initial image. Movement maps were built with the image processing python application for each of the organisms to determine movement behaviors in relation to their positioning. Changes in coordinates vs. the time associated with each frame were used to evaluate location (i.e., swimming track density), distance, and velocity. Frames with movement vs. those where coordinates were unchanged were used to evaluate percent time swimming. Because it captures location, swimming track density is an assessment of swimming performance that captures behavioral changes not observed in individual swimming metrics (e.g. distance, velocity)55,56.

GraphPad PRISM (Version 9.5.1 for Mac, San Diego, USA) was used to conduct statistical analyses on *D. magna* swimming behavior endpoints. First, data were tested for normality using the Shapiro-Wilk test, which has high statistical power can be used for small sample sizes (n<50). Outliers within datasets were removed using the ROUT method (Q=5%)57 using swimming distance as the main parameter, removing six datapoints on top of eliminating swimming data for the six dead or immobilized *D. magna*. Barlett’s test was used to evaluate homogeneity of variances in all remaining data. Correlations between concentrations and sublethal endpoints were determined through using the Pearson correlation test. One-way analysis of variance (ANOVA) with Tukey’s multi-comparison test (P≤0.05) was performed on distance and %time swimming data Swimming velocity did not have equality of variance, and therefore was evaluated using a Chi2 test between all treatments58 using Bonferroni correction to adjust significance level for multiple Chi2 tests (30 comparisons total) resulting in an overall significance level of 0.002.

*Zebrafish exposures*

Adult Ekkwill zebrafish (Ekkwill Waterlife Resources, Ruskin FL) were maintained in a recirculating AHAB system (Pentair Aquatic Ecosystems, Apopka, FL) at 28°C with a 14:10 h light:dark cycle. Fish were fed *Artemia* nauplii in the mornings and Zeigler’s Adult Zebrafish Complete Diet (Pentair Aquatic Ecosystems) in the afternoons. Breeder tanks, each containing 3 females and 2 males, were set up at 4 PM on the day before embryo exposures. Adults were spawned naturally the following morning within 2 hours of the beginning of the light cycle. Embryos were transferred to Petri dishes (VWR International, West Chester, PA, USA) containing 30% Danieau’s medium (17.4 mM NaCl, 0.21 mM KCl, 0.12 mM MgSO4, 0.18 mM Ca(NO3)2, and 1.5 mM HEPES, pH 7.2) and placed in an incubator at 28°C until exposure.

At 6 hours post-fertilization (hpf; shield stage), embryos were screened for viability and development59 using a dissecting stereomicroscope (Nikon SMZ1500, Nikon Instruments, Inc., Melville, NY). Normal embryos were selected and transferred to small glass Petri dishes each containing 10 mL of treatment solution. Treatments consisted of bis-FMeSI dissolved in nanopure water to make a stock concentration of 0.48 mg/mL. This stock was diluted into test concentrations with 30% Danieau’s medium. Each compound was tested at the following concentrations (ng/L): 0 (control) 25, 250, 2500, 25000, or 250000. Exposures were also conducted with field-collected water samples from the MN region (MN4, MN15, MN22). Field water samples were transferred to 50 mL centrifuge tubes and blinded as to their identity for toxicity testing. Water samples were brought to 28°C just prior to use. These samples were diluted to 50% with 30% Danieau’s medium for exposures60. There was a final density of 1 embryo/mL/dish and three replicate dishes per treatment group (n=30) for each assay. Dishes were placed in an incubator at 28°C with a 14:10 h light:dark cycle. Embryos were observed daily for survival and hatching. Mortality was determined by lack of heartbeat, and those individuals were removed from the dish.

Embryos (n=14/group) were assayed *in vivo* at 30 hpf for mitochondrial function using the Agilent Seahorse XFe96 Extracellular Flux Analyzer (Agilent Instruments, Santa Clara, CA) according to previously established protocols (*10*). Briefly, oxygen consumption (OCR; pmol/min) was measured during a time course in which drugs are injected to in order to quantify various mitochondrial processes by modifying functions of the electron transport chain (ETC). Oligomycin A (9.4 µM; Sigma-Aldrich, St. Louis, MO) was injected following basal measurements to inhibit ATP synthase (complex V) and measure ATP-linked respiration. Proton leak was calculated based on the difference between ATP-linked respiration and basal respiration. Carbonyl cyanide 4 (trifluoromethoxy)phenylhydrazone (FCCP, 2.5 µM; Sigma-Aldrich) is an uncoupler that collapses the proton gradient and disrupts mitochondrial membrane potential. The resultant uninhibited flow of electrons through the ETC and oxygen consumption by complex IV pushes mitochondria to their maximum respiration rate. From this, maximum respiration and spare capacity (the difference between maximal and basal respiration), the ability to respond to an increased energy demand or stress, was calculated. Sodium azide (6.25 mM; Sigma-Aldrich) inhibits oxidative phosphorylation via inhibition of cytochrome c oxidase, rapidly depleting intracellular ATP and effectively shutting down mitochondrial respiration. The remaining non-mitochondrial respiration is attributed to enzymes and other factors within the cells that continue to consume oxygen.

Larval locomotion was measured at 6 days post-fertilization (dpf) using the DanioVision video-tracking system with Ethovision XT 13 software (Noldus, Leesburg, VA, USA). Larvae were individually transferred to wells of a clear 96-well plates (Greiner Bio-One, Monroe, NC) containing clean Danieau’s medium (n=30/group). Then larvae were acclimated in the plate at 28°C for 1 hr. At the end of this acclimation period, the plate was placed in the DanioVision observation chamber 28°C. A 50-min long assay was then begun. The first 10 min of the assay was a habituation period in the dark to these conditions followed by two, alternating 10 min long light and dark periods. Larvae were assessed for total distance traveled (mm) within light and dark as well as the accumulated distance traveled during the assay not including the habituation period.

A series of statistical analyses were conducted on zebrafish data. For mitochondrial bioenergetics data, the interquartile method was used to identify and remove outlier points by phase within each treatment group within each treatment group. Then individual parameters were calculated for each embryo. Basal respiration was the average of the three lowest OCR values before the introduction of any drugs. Non-mitochondrial respiration was the average of the three lowest OCR values following the addition of sodium azide. Basal mitochondrial respiration was defined as basal respiration minus non-mitochondrial respiration. ATP production was calculated by subtracting the three lowest OCR values following the addition of Oligomycin A from basal respiration. Proton leak was calculated by first averaging the three lowest OCR values following the addition of Oligomycin A and then subtracting non-mitochondrial respiration. To find maximal mitochondrial respiration, the three highest OCR values following the addition of FCCP were averaged, and then the non-mitochondrial respiration subtracted from this average. This average was also used to calculate spare capacity by subtracting basal respiration from it. For larval locomotion, total distance traveled (mm) for each minute of the assay not including habituation was added to generate accumulated distance traveled (mm).

Statistics were done in GraphPad Prism 9.5.1 (GraphPad Software, Inc., La Jolla, CA). All data were tested for normality with a Shapiro–Wilk test and homogeneity of variance with a Bartlett’s test. One-way ANOVA with a post-hoc Tukey test (α= 0.05) was used to compare treatment groups within each parameter for mitochondrial function as well as locomotion. All data are presented as mean ± SEM.

*Rapid small-scale column tests (RSSCTs)*

The parameters of granular activated carbon (GAC) and ion exchange (IX) columns used in this study are shown in **Table S5**. The RSSCT column was assembled using polypropylene (PP) tubing with a 0.318 cm inside diameter and stainless steel valves and fittings from Swagelok (Solon, OH). A ~3 cm glass wool base was packed at the bottom of the column to provide support and stabilize the GAC/IX bed position during the run. Crushed GAC (0.042 g) and IX (0.011 g) were weighed in a beaker and then soaked in deionized water, followed by degassing in a vacuum desiccator for 24 hours prior to packing. Degassed GAC/IX were loaded into the column using a glass Pasteur pipette. The packed GAC/IX column was equilibrated for 24 hours by pumping deionized water through the column at the design flow rate using a Shimadzu LC pump (Model LC-20AT, Shimadzu Scientific, Columbia, MD). The influent solution was then switched to surface water or groundwater, which was dosed with 21 PFAS (**Figs. S17** and **S18**) at concentrations ranging from 80-100 ng/L. Influent samples were collected directly from the container at the beginning and end of the run. During the RSSCT run, effluent samples were collected periodically for PFAS analysis together with the influent samples. To capture the breakthrough of PFAS breaking through both early (e.g., PFMOAA and PFBA) and late (e.g., PFDA and PFOS), around 4 mL of samples were taken approximately every 250 bed volumes (BVs) for the first 1000 BVs treated, then every 500 BVs until 2000 BVs treated, then every 1000 BVs until 15,000 BVs treated, then every 5,000 BVs until 50,000 BVs (GAC column run was completed) treated, and then every 20,000 BVs (IX only) until the run was complete.

*Alkaline heat-activated oxidation*

Three bis-FASI homologues, bis-FMeSI, bis-FEtSI, and bis-FBSI, were subjected to an alkaline, heat-activated persulfate oxidation to screen fate during advanced oxidative treatment and during application of the total oxidizable precursor (TOP) assay. The TOP assay is a commonly applied PFAS analytical tool that evaluates the total molar concentration of oxidizable PFAS by measuring PFCA concentrations pre- and post-oxidation. The oxidation step converts perfluoroalkyl acid (PFAA) precursors to terminal PFCAs such that the change in PFCA concentration can be used to infer a total molar, oxidizable precursor concentration. The TOP assay facilitates evaluation of concentrations of "unknown" PFAS in samples since many PFAS do not have the analytical standards needed to analyze them directly using targeted analysis. In this study, deionized water was spiked with 1000 ng/L of each of the 3 bis-FASI homologues and subjected to the TOP assay following published techniques61,62. Briefly, spiked samples were amended with 100 mM potassium persulfate and 220 mM sodium hydroxide and placed in a water bath (Fisher Scientific, FSSWB15) for 12 hours at 85 °C. Following the oxidation, samples were cool downed to room temperature, and pH was adjusted to 5-9 by HCl. Aqueous samples were then prepared for targeted analysis as described above.

**References**

50. Shojaei, M., Kumar, N. & Guelfo, J. L. An Integrated Approach for Determination of Total Per- and Polyfluoroalkyl Substances (PFAS). *Environ. Sci. Technol.* **56**, 14517–14527 (2022).

51. Shojaei, M. *et al.* Enhanced Recovery of Per- and Polyfluoroalkyl Substances (PFASs) from Impacted Soils Using Heat Activated Persulfate. *Environ. Sci. Technol.* acs.est.0c08069 (2021) doi:10.1021/acs.est.0c08069.

52. Pétré, M.-A. *et al.* Per- and Polyfluoroalkyl Substance (PFAS) Transport from Groundwater to Streams near a PFAS Manufacturing Facility in North Carolina, USA. *Environ. Sci. Technol.* **55**, 5848–5856 (2021).

53. USEPA. *Methods for Measuring the Toxicity and Bioaccumulation of Sediment-associated Contaminants with Freshwater Invertebrates*. internal-pdf://USEPA 2000-0707894272/USEPA 2000.pdf (2000).

54. Bradski, G. The OpenCV Library. *Dr. Dobb’s Joural of Software Tools*.

55. Bownik, A. Daphnia swimming behaviour as a biomarker in toxicity assessment: A review. *Science of The Total Environment* **601–602**, 194–205 (2017).

56. Bownik, A., Sokołowska, N. & Ślaska, B. Effects of apomorphine, a dopamine agonist, on Daphnia magna: Imaging of swimming track density as a novel tool in the assessment of swimming activity. *Science of The Total Environment* **635**, 249–258 (2018).

57. Motulsky, H. J. & Brown, R. E. Detecting outliers when fitting data with nonlinear regression – a new method based on robust nonlinear regression and the false discovery rate. *BMC Bioinformatics* **7**, 123 (2006).

58. Satterthwaite, F. E. Synthesis of variance. *Psychometrika* **6**, 309–316 (1941).

59. Kimmel, C. B., Ballard, W. W., Kimmel, S. R., Ullmann, B. & Schilling, T. F. Stages of embryonic development of the zebrafish. *Dev. Dyn.* **203**, 253–310 (1995).

60. Babich, R. *et al.* Defining drinking water metal contaminant mixture risk by coupling zebrafish behavioral analysis with citizen science. *Sci Rep* **11**, 17303 (2021).

61. Houtz, E. F. & Sedlak, D. L. Oxidative Conversion as a Means of Detecting Precursors to Perfluoroalkyl Acids in Urban Runoff. *Environmental Science & Technology* **46**, 9342–9349 (2012).

62. Houtz, E. F., Higgins, C. P., Field, J. A. & Sedlak, D. L. Persistence of Perfluoroalkyl Acid Precursors in AFFF-Impacted Groundwater and Soil. *Environmental Science & Technology* **47**, 8187–8195 (2013).
