# Supplementary material for: The dirty side of clean energy: Lithium ion batteries as a source of PFAS in the environment
Source: Research Square preprint supplement (doi:10.21203/rs.3.rs-3150504/v1), 2023-08-01
Supplement: Supplementary file 3 [file a3b57bf1017b057581af2247.xlsx]

## Sheet: Data S1
Data S1. Concentrations of PFAS measured in surface water and snow (MN6) samples during the January 2022 sampling event in the Cottage Grove, MN region. PFAS from Table S1 that are not shown here were not detected in any project field sample.
	PFBA		PFPeA		PFHxA		PFHpA		PFOA		PFNA		PFDA		PFUnA		PFDoA		PFTrA		PFTeDA		PFBS		PFPeS		PFHxS		PFHpS		PFOS		PFNS		PFDS		bis-FMeSIb		FBSA		FHxSA		FOSA		MeFOSAA		EtFOSAA		8-ClPFOS
Site	ng/L	stdev	ng/L	stdev	ng/L	stdev	ng/L	stdev	ng/L	stdev	ng/L	stdev	ng/L	stdev	ng/L	stdev	ng/L	stdev	ng/L	stdev	ng/L	stdev	ng/L	stdev	ng/L	stdev	ng/L	stdev	ng/L	stdev	ng/L	stdev	ng/L	stdev	ng/L	stdev	ng/L	stdev	ng/L	stdev	ng/L	stdev	ng/L	stdev	ng/L	stdev	ng/L	stdev	ng/L
MN 1	12.4266	2.51733	ND	NA	ND	NA	ND	NA	5.24397	0.307065	ND	NA	ND	NA	ND	NA	ND	NA	ND	NA	ND	NA	ND	NA	ND	NA	ND	NA	ND	NA	ND	NA	ND	NA	ND	NA	2.039	NA	ND	NA	ND	NA	ND	NA	ND	NA	ND	NA	ND
MN 2	264.141	8.12234	23.2193	1.68316	16.6845	0.168879	5.9705	0.168599	38.7778	7.89239	ND	NA	ND	NA	ND	NA	ND	NA	ND	NA	ND	NA	11.2544	1.13767	14.4949	0.159437	45.7713	3.81098	ND	NA	18.5076	1.14753	ND	NA	ND	NA	35.62	NA	10.4702	1.16503	ND	NA	ND	NA	ND	NA	ND	NA	ND
MN 3	25.6688	2.18341	ND	NA	ND	NA	ND	NA	4.60983	4.97682	ND	NA	ND	NA	ND	NA	ND	NA	ND	NA	ND	NA	ND	NA	ND	NA	ND	NA	ND	NA	ND	NA	ND	NA	ND	NA	2.036	NA	ND	NA	ND	NA	ND	NA	ND	NA	ND	NA	ND
MN 4a	3279.3	NA	202.541	NA	32.768	NA	3.968	NA	15.779	NA	ND	NA	ND	NA	ND	NA	ND	NA	ND	NA	ND	NA	400.764	NA	4.611	NA	ND	NA	ND	NA	12.098	NA	ND	NA	ND	NA	439.761	NA	3.201	NA	ND	NA	3.256	NA	ND	NA	ND	NA	NA
MN 4 dupa	3813	NA	189.338	NA	30.601	NA	3.437	NA	14.94	NA	ND	NA	ND	NA	ND	NA	ND	NA	ND	NA	ND	NA	394.805	NA	4.717	NA	ND	NA	ND	NA	8.095	NA	ND	NA	ND	NA	411.506	NA	3.389	NA	ND	NA	2.755	NA	ND	NA	ND	NA	NA
MN 5	26.8487	9.6003	5.29356	1.70917	ND	NA	ND	NA	7.21659	1.20931	ND	NA	ND	NA	ND	NA	ND	NA	ND	NA	ND	NA	ND	NA	ND	NA	ND	NA	ND	NA	ND	NA	ND	NA	ND	NA	4.648	NA	ND	NA	ND	NA	ND	NA	ND	NA	ND	NA	ND
MN 6a	3.43	NA	ND	NA	ND	NA	ND	NA	ND	NA	ND	NA	ND	NA	ND	NA	ND	NA	ND	NA	ND	NA	2.309	NA	ND	NA	ND	NA	ND	NA	ND	NA	ND	NA	ND	NA	6.876	NA	1.103	NA	ND	NA	ND	NA	ND	NA	ND	NA	NA
MN 7	21.433	1.49447	ND	NA	2.30864	1.58436	ND	NA	6.6517	1.91346	ND	NA	ND	NA	ND	NA	ND	NA	ND	NA	ND	NA	ND	NA	ND	NA	ND	NA	ND	NA	2.04378	0.605147	ND	NA	ND	NA	5.202	NA	ND	NA	ND	NA	ND	NA	ND	NA	ND	NA	ND
MN 8	16.5489	1.41607	ND	NA	ND	NA	ND	NA	8.81859	0.828566	ND	NA	ND	NA	ND	NA	ND	NA	ND	NA	ND	NA	3.48843	2.79817	ND	NA	ND	NA	ND	NA	3.11169	1.16457	ND	NA	ND	NA	4.833	NA	ND	NA	ND	NA	ND	NA	ND	NA	ND	NA	ND
MN 9a	26.939	NA	2.071	NA	2.721	NA	ND	NA	4.611	NA	ND	NA	ND	NA	ND	NA	ND	NA	ND	NA	ND	NA	5.139	NA	ND	NA	1.864	NA	ND	NA	2.232	NA	ND	NA	ND	NA	4.155	NA	ND	NA	ND	NA	ND	NA	ND	NA	ND	NA	NA
MN 10	25.7853	1.22449	3.37377	0.51332	ND	NA	ND	NA	8.54707	2.31086	ND	NA	ND	NA	ND	NA	ND	NA	ND	NA	ND	NA	ND	NA	ND	NA	ND	NA	ND	NA	2.59911	1.41234	ND	NA	ND	NA	9.702	NA	ND	NA	ND	NA	ND	NA	ND	NA	ND	NA	ND
MN 11	20.0863	4.05605	3.95382	0.0481848	ND	NA	ND	NA	7.07264	2.57639	ND	NA	ND	NA	ND	NA	ND	NA	ND	NA	ND	NA	ND	NA	ND	NA	ND	NA	ND	NA	3.18334	0.398808	ND	NA	ND	NA	56.498	NA	ND	NA	ND	NA	ND	NA	ND	NA	ND	NA	ND
MN 12	55.1485	11.4726	2.95869	1.31986	ND	NA	ND	NA	7.91011	0.0520558	ND	NA	ND	NA	ND	NA	ND	NA	ND	NA	ND	NA	ND	NA	ND	NA	ND	NA	ND	NA	ND	NA	ND	NA	ND	NA	ND	NA	ND	NA	ND	NA	ND	NA	ND	NA	ND	NA	ND
MN 13	43.041	2.69878	3.58269	0.171977	ND	NA	ND	NA	ND	0.533628	ND	NA	ND	NA	ND	NA	ND	NA	ND	NA	ND	NA	5.50681	2.65047	ND	NA	ND	NA	ND	NA	ND	NA	ND	NA	ND	NA	ND	NA	ND	NA	ND	NA	ND	NA	ND	NA	ND	NA	ND
MN 14	10.3149	0.518286	ND	NA	ND	NA	ND	NA	2.24093	1.91206	ND	NA	ND	NA	ND	NA	ND	NA	ND	NA	ND	NA	ND	NA	15.6646	0.782341	ND	NA	ND	NA	ND	NA	ND	NA	ND	NA	ND	NA	ND	NA	ND	NA	ND	NA	ND	NA	ND	NA	ND
Field Blank	ND	NA	ND	NA	ND	NA	ND	NA	ND	NA	ND	NA	ND	NA	ND	NA	ND	NA	ND	NA	ND	NA	ND	NA	ND	NA	ND	NA	ND	NA	ND	NA	ND	NA	ND	NA	ND	NA	ND	NA	ND	NA	ND	NA	ND	NA	ND	NA	ND
	a.	Sample was analyzed by Duke University. Where results are NA this indicates an analyte not included on Duke's target analyte list. All other samples analyzed at Texas Tech University
	b.	Analyte data provided by Duke University because standard was not available in TTU's lab at the time of sample analysis
[truncated: 16 more columns]

## Sheet: Data S2
Data S2. Concentrations of PFAS measured in surface water samples during the June 2022 sampling event in the Cottage Grove, MN region. PFAS from Table S1 that are not shown here were not detected in any project field sample.
	PFBA		PFPeA		PFHxA		PFHpA		PFOA		PFNA		PFDA		PFUnA		PFDoA		PFTrDA		PFTeDA		PFBS		PFPeS		PFHxS		PFHpS		PFOS		PFNS		PFDS		bis-FMeSI		bis-FEtSIa		bis-FBSIa		FBSA		FHxSA		FOSA		MeFOSAA
Site	ng/L	stdev	ng/L	stdev	ng/L	stdev	ng/L	stdev	ng/L	stdev	ng/L	stdev	ng/L	stdev	ng/L	stdev	ng/L	stdev	ng/L	stdev	ng/L	stdev	ng/L	stdev	ng/L	stdev	ng/L	stdev	ng/L	stdev	ng/L	stdev	ng/L	stdev	ng/L	stdev	ng/L	stdev	NA	NA	NA	NA	ng/L	stdev	ng/L	stdev	ng/L	stdev	ng/L
MN 1	7.234	0.724743	ND	0.144665	ND	NA	2.73675	0.119254	ND	NA	ND	NA	ND	NA	ND	NA	ND	NA	ND	NA	ND	NA	ND	NA	ND	NA	ND	NA	ND	NA	ND	NA	ND	NA	ND	NA	ND	NA	NA	NA	NA	NA	ND	NA	ND	NA	ND	NA	ND
MN 2	9.262	1.0105	ND	NA	ND	NA	3.03696	0.324102	ND	NA	ND	NA	ND	NA	ND	NA	ND	NA	ND	NA	ND	NA	131.789	2.4579	ND	NA	ND	NA	ND	NA	ND	NA	ND	NA	ND	NA	ND	NA	NA	NA	NA	NA	ND	NA	ND	NA	ND	NA	ND
MN 3	11.757	10.7448	ND	NA	ND	NA	ND	NA	ND	NA	ND	NA	ND	NA	ND	NA	ND	NA	ND	NA	ND	NA	17.8187	1.0656	ND	NA	ND	NA	ND	NA	ND	NA	ND	NA	ND	NA	ND	NA	NA	NA	NA	NA	ND	NA	ND	NA	ND	NA	ND
MN 4	5274.4	13.8549	460.851	3.63908	158.416	9.65147	14.623	1.98116	81.2686	11.3163	ND	NA	ND	NA	ND	NA	ND	NA	ND	NA	ND	NA	708.243	33.4862	62.3171	2.86364	91.1236	3.85844	5.608	NA	63.5727	2.72989	ND	NA	14.0735	0.418378	2436.59	101.848	ND	NA	ND	NA	6.21786	0.31893	ND	NA	9.44354	1.27764	ND
MN 4 dup	5501	117.637	459.86	13.2362	140.019	6.80208	15.0421	1.60702	85.3849	14.4261	ND	NA	ND	NA	ND	NA	ND	NA	ND	NA	ND	NA	732.37	33.507	64.7734	6.37717	100.209	1.12307	4.497	NA	67.0499	5.25715	ND	NA	13.2671	1.22119	2395.07	53.1672	ND	NA	ND	NA	5.36246	0.979651	ND	NA	10.5739	0.490854	ND
MN 5	10.106	0.461376	1.798	0.673166	ND	NA	ND	NA	1.62681	0.818503	ND	NA	ND	NA	ND	NA	ND	NA	ND	NA	ND	NA	22.4417	2.13971	ND	NA	ND	NA	ND	NA	ND	NA	ND	NA	ND	NA	ND	NA	NA	NA	NA	NA	ND	NA	ND	NA	ND	NA	ND
MN 8	10.5913	0.491892	1.635	0.0636396	ND	NA	3.12	0.214349	1.19348	0.591032	ND	NA	ND	NA	ND	NA	ND	NA	ND	NA	ND	NA	112.401	7.70464	ND	NA	ND	NA	ND	NA	ND	NA	ND	NA	ND	NA	ND	NA	NA	NA	NA	NA	ND	NA	ND	NA	ND	NA	ND
MN 9	6.21067	0.686563	1.14133	0.300841	ND	NA	ND	NA	ND	NA	ND	NA	ND	NA	ND	NA	ND	NA	ND	NA	ND	NA	77.0437	0.711349	ND	NA	ND	NA	ND	NA	ND	NA	ND	NA	ND	NA	2.921	0.199404	NA	NA	NA	NA	ND	NA	ND	NA	ND	NA	ND
MN 10	6.78733	1.70216	1.07667	0.557151	ND	NA	3.00503	0.184592	ND	NA	ND	NA	ND	NA	ND	NA	ND	NA	ND	NA	ND	NA	19.0053	1.33586	ND	NA	ND	NA	ND	NA	ND	NA	ND	NA	ND	NA	4.397	0.0325269	NA	NA	NA	NA	ND	NA	ND	NA	ND	NA	ND
MN 11	6.64333	2.6232	ND	NA	ND	NA	3.00554	0.139547	ND	NA	ND	NA	ND	NA	ND	NA	ND	NA	ND	NA	ND	NA	132.489	1.50936	ND	NA	ND	NA	ND	NA	ND	NA	ND	NA	ND	NA	ND	NA	NA	NA	NA	NA	ND	NA	ND	NA	ND	NA	ND
MN 12	70.3713	2.2371	3.23467	1.76955	ND	NA	ND	NA	3.14627	0.122574	ND	NA	ND	NA	ND	NA	ND	NA	ND	NA	ND	NA	1.37	0.69	ND	NA	ND	NA	ND	NA	ND	NA	ND	NA	ND	NA	ND	NA	NA	NA	NA	NA	ND	NA	ND	NA	ND	NA	ND
MN 13	48.8213	1.75501	1.25533	0.357823	ND	NA	ND	NA	ND	NA	ND	NA	ND	NA	ND	NA	ND	NA	ND	NA	ND	NA	ND	NA	ND	NA	ND	NA	ND	NA	ND	NA	ND	NA	ND	NA	ND	NA	NA	NA	NA	NA	ND	NA	ND	NA	ND	NA	ND
MN 14	9.45467	1.00918	ND	NA	ND	NA	2.77756	0.237945	ND	NA	ND	NA	ND	NA	ND	NA	ND	NA	ND	NA	ND	NA	1.7	0.69	ND	NA	ND	NA	ND	NA	ND	NA	ND	NA	ND	NA	ND	NA	NA	NA	NA	NA	ND	NA	ND	NA	ND	NA	ND
MN 15	9.00333	0.641967	1.13533	0.201001	ND	NA	2.94858	0.25338	ND	NA	ND	NA	ND	NA	ND	NA	ND	NA	ND	NA	ND	NA	116.38	7.10925	ND	NA	ND	NA	ND	NA	ND	NA	ND	NA	ND	NA	ND	NA	NA	NA	NA	NA	ND	NA	ND	NA	ND	NA	ND
MN 16	5.942	0.330624	ND	NA	ND	NA	2.90168	0.0813848	ND	NA	ND	NA	ND	NA	ND	NA	ND	NA	ND	NA	ND	NA	ND	NA	ND	NA	ND	NA	ND	NA	ND	NA	ND	NA	ND	NA	ND	NA	NA	NA	NA	NA	ND	NA	ND	NA	ND	NA	ND
MN 17	ND	NA	ND	NA	ND	NA	ND	NA	ND	NA	ND	NA	ND	NA	ND	NA	ND	NA	ND	NA	ND	NA	ND	NA	ND	NA	ND	NA	ND	NA	ND	NA	ND	NA	ND	NA	ND	NA	NA	NA	NA	NA	ND	NA	ND	NA	ND	NA	ND
MN 18	9.06067	0.274462	1.05267	0.173117	ND	NA	2.89233	0.260384	ND	NA	ND	NA	ND	NA	ND	NA	ND	NA	ND	NA	ND	NA	142.304	2.1793	ND	NA	ND	NA	ND	NA	ND	NA	ND	NA	ND	NA	ND	NA	NA	NA	NA	NA	ND	NA	ND	NA	ND	NA	ND
MN 19	73.951	5.31037	9.465	1.25441	6.287	0.660438	3.32315	0.093117	16.2	1.94837	ND	NA	ND	NA	ND	NA	ND	NA	ND	NA	ND	NA	142.588	3.91313	ND	NA	4.69383	0.999321	ND	NA	16.3635	1.13358	ND	NA	ND	NA	32.411	1.23744	NA	NA	NA	NA	ND	NA	ND	NA	ND	NA	ND
MN 20	16.842	1.42823	3.014	1.34896	1.43467	0.164163	3.19505	0.184642	2.40109	1.41825	ND	NA	ND	NA	ND	NA	ND	NA	ND	NA	ND	NA	107.115	3.51573	ND	NA	ND	NA	ND	NA	ND	NA	ND	NA	ND	NA	ND	NA	NA	NA	NA	NA	ND	NA	ND	NA	ND	NA	ND
MN 21	7.264	0.614137	1.24667	0.229306	ND	NA	2.91977	0.0248729	ND	NA	ND	NA	ND	NA	ND	NA	ND	NA	ND	NA	ND	NA	9.05967	0.855599	ND	NA	ND	NA	ND	NA	ND	NA	ND	NA	ND	NA	ND	NA	NA	NA	NA	NA	ND	NA	ND	NA	ND	NA	ND
MN 22	1468.51	2.56997	140.193	5.42483	52.5393	1.67734	8.73172	0.702778	60.0484	9.37153	ND	NA	ND	NA	ND	NA	ND	NA	ND	NA	ND	NA	334.195	0.110309	22.1556	2.49543	41.5142	4.31604	10.6806	1.60338	114.512	2.56056	ND	NA	10.5575	0.966889	782.922	5.3507	ND	NA	ND	NA	3.133	0.277045	ND	NA	8.02262	1.22952	ND
MN 23	65.322	1.84914	4.531	1.03096	3.49	0.326074	4.05618	0.685495	8.47059	2.3101	ND	NA	ND	NA	ND	NA	ND	NA	ND	NA	ND	NA	0.766667	0.0771751	ND	NA	4.5219	0.305084	ND	NA	6.69874	0.693193	ND	NA	ND	NA	3.71	0.276962	NA	NA	NA	NA	ND	NA	ND	NA	ND	NA	ND
MN 24	110.987	0.960263	10.0193	0.487903	15.9513	1.60522	15.0896	1.33579	122.221	4.86862	3.22678	0.273263	ND	NA	ND	NA	ND	NA	ND	NA	ND	NA	3.12667	0.766504	3.73838	0.797709	15.0184	1.8794	8.08301	0.566238	330.094	10.6699	ND	NA	ND	NA	ND	NA	NA	NA	NA	NA	ND	NA	ND	NA	ND	NA	ND
MN 25	78.26	0.296985	1.72333	0.366357	ND	NA	ND	NA	ND	NA	ND	NA	ND	NA	ND	NA	ND	NA	ND	NA	ND	NA	ND	NA	ND	NA	ND	NA	ND	NA	ND	NA	ND	NA	ND	NA	ND	NA	NA	NA	NA	NA	ND	NA	ND	NA	ND	NA	ND
MN 26	204.093	0.702385	6.366	0.233778	1.495	0.304056	ND	NA	ND	NA	ND	NA	ND	NA	ND	NA	ND	NA	ND	NA	ND	NA	ND	NA	ND	NA	ND	NA	ND	NA	ND	NA	ND	NA	ND	NA	ND	NA	NA	NA	NA	NA	ND	NA	ND	NA	ND	NA	ND
MN 27	838.481	17.5368	14.6013	1.00535	17.0027	1.75036	6.36797	0.443783	55.7321	8.14474	ND	NA	ND	NA	ND	NA	ND	NA	ND	NA	ND	NA	3.68167	1.40997	ND	NA	6.14638	1.01943	ND	NA	53.1938	3.7722	ND	NA	ND	NA	4.542	0.786303	NA	NA	NA	NA	ND	NA	ND	NA	ND	NA	ND
Field Blank_1	ND	NA	ND	NA	ND	NA	ND	NA	ND	NA	ND	NA	ND	NA	ND	NA	ND	NA	ND	NA	ND	NA	ND	NA	ND	NA	ND	NA	ND	NA	ND	NA	ND	NA	ND	NA	ND	NA	NA	NA	NA	NA	ND	NA	ND	NA	ND	NA	ND
Field Blank_2	ND	NA	ND	NA	ND	NA	ND	NA	ND	NA	ND	NA	ND	NA	ND	NA	ND	NA	ND	NA	ND	NA	ND	NA	ND	NA	ND	NA	ND	NA	ND	NA	ND	NA	ND	NA	ND	NA	NA	NA	NA	NA	ND	NA	ND	NA	ND	NA	ND
	a.	Analyte standard was not available in laboratory at the time of initial sample analysis, but select, high concentration samples were reanalyzed after standards were acquired.
	b.	Analyte data provided by Duke University because standard was not available in TTU's lab at the time of sample analysis
[truncated: 19 more columns]

## Sheet: Data S3
Data S3. Concentrations of PFAS measured in soil (MN 28-MN 31) and sediment (MN1, MN4, MN24, MN 27) samples during the June 2022 sampling event in the Cottage Grove, MN region. PFAS from Table S1 that are not shown here were not detected in any project field sample.
	PFBA		PFPeA		PFHxA		PFHpA		PFOA		PFNA		PFDA		PFUnA		PFDoA		PFTrA		PFTeDA		PFBS		PFPeS		PFHxS		PFHpS		PFOS		PFNS		PFDS		bis-FMeSI		FBSA		FHxSA		FOSA		MeFOSAA		EtFOSAA		8-ClPFOSa
Site	ng/kg	stdev	ng/kg	stdev	ng/kg	stdev	ng/kg	stdev	ng/kg	stdev	ng/kg	stdev	ng/kg	stdev	ng/kg	stdev	ng/kg	stdev	ng/kg	stdev	ng/kg	stdev	ng/kg	stdev	ng/kg	stdev	ng/kg	stdev	ng/kg	stdev	ng/kg	stdev	ng/kg	stdev	ng/kg	stdev	ng/kg	stdev	ng/kg	stdev	ng/kg	stdev	ng/kg	stdev	ng/kg	stdev	ng/kg	stdev	ng/kg
MN 1	8.25216	2.4387	ND	NA	8.59941	6.71728	ND	NA	ND	NA	1.86574	0.259031	1.22351	0.585774	ND	NA	2.5562	1.22712	ND	NA	2.23323	0.471917	ND	NA	ND	NA	ND	NA	ND	NA	7.77063	NA	ND	NA	ND	NA	ND	NA	8.95323	1.02779	ND	NA	ND	NA	ND	NA	ND	NA	NA
MN 4	1670.74	153.43	196.903	21.7576	193.609	38.4273	111.372	11.0219	1986.69	192.767	17.0322	0.825141	169.782	67.1016	222.524	38.7815	868.853	32.1383	268.673	60.3198	121.881	17.9957	247.994	46.8322	ND	NA	119.594	14.5794	51.3334	6.95815	4938.9	64.1102	365.343	87.2375	949.723	35.331	1626.41	222.214	ND	NA	129.193	6.90344	6728.04	1080.54	12966.6	1291.58	22646.7	4062.83	NA
MN 24	45.4801	13.7186	1.16898	0.054209	ND	NA	5.51708	3.38407	143.917	12.0538	5.31115	0.932908	40.4193	5.43044	6.61972	3.54782	ND	NA	ND	NA	ND	NA	ND	NA	ND	NA	17.7944	1.99127	20.3161	0.985847	2421.87	90.3407	ND	NA	1.16776	0.308922	ND	NA	ND	NA	ND	NA	27.1126	0.890742	15.5016	18.8238	118.678	89.1226	NA
MN 27	116.054	15.2449	31.3669	35.0142	44.5057	0.743765	12.8722	7.99345	13.2528	6.45997	ND	NA	5.17017	3.25922	9.58054	0.78686	ND	NA	ND	NA	ND	NA	ND	NA	ND	NA	21.4369	4.66626	ND	NA	211.655	62.2067	ND	NA	ND	NA	22.8602	11.5564	ND	NA	ND	NA	ND	NA	ND	NA	ND	NA	NA
MN 28	363.02	37.1036	98.8302	0.672942	ND	NA	ND	NA	622.274	106.489	36.5509	5.15344	26.0697	3.56439	15.6035	8.29698	8.11443	3.62534	ND	NA	ND	NA	254.481	213.937	ND	NA	ND	NA	7.07088	4.32726	35.7981	1.71196	ND	NA	4531.8	2282.34	960.947	165.998	ND	NA	ND	NA	ND	NA	ND	NA	ND	NA	NA
MN 29	62.3601	18.1822	ND	NA	ND	NA	3.76516	1.41805	139.264	29.9927	35.2272	6.40913	88.2549	28.972	72.6507	16.8695	89.6793	35.1801	36.2918	26.982	35.1485	11.9109	ND	NA	ND	NA	ND	NA	ND	NA	1418.58	309.101	ND	NA	44258.8	8980.13	2299.64	362.838	28.8484	8.02175	ND	NA	31.501	6.25406	7.93274	7.2174	15.0268	3.51353	NA
MN 30	34.12	5.2859	ND	NA	ND	NA	7.317	0.817724	164.202	27.9647	64.71	7.68331	210.159	45.0261	48.8215	8.4507	78.0709	9.32547	23.1274	7.30264	41.5831	10.4763	137.047	82.035	ND	NA	12.9367	1.75693	ND	NA	871.425	6.67684	ND	NA	5622.42	513.174	470.355	348.785	ND	NA	ND	NA	ND	NA	ND	NA	ND	NA	NA
MN 31	29.1217	5.59902	ND	NA	ND	NA	ND	NA	25.1027	7.7272	13.0624	1.36474	27.2149	4.09342	26.4914	5.25649	18.4667	4.70802	36.1075	32.8085	ND	NA	ND	NA	ND	NA	ND	NA	132.07	27.2013	285.639	35.1709	ND	NA	8133.41	1348.62	226.483	36.6729	ND	NA	ND	NA	ND	NA	ND	NA	ND	NA	NA
	a.	Analyte not included in soil or sediment extract analysis.
[truncated: 15 more columns]

## Sheet: Data S4
Data S4. Concentrations of PFAS measured in surface water samples collected while traveling to and from KY (KY 1-2, KY 31-32) near Paducah, KY (KY 2-KY1 6) and near Louisville, KY (KY 17-22) during the September 2022 sampling event. PFAS from Table S1 that are not shown here were not detected in any project field sample.
	PFBA		PFPeA		PFHxA		PFHpA		PFOA		PFNA		PFDA		PFUnA		PFDoA		PFTrA		PFTeDA		PFBS		PFPeS		PFHxS		PFHpS		PFOS		PFNS		PFDS		bis-FMeSI		bis-FEtSI		bis-FBSI		FBSA		FHxSA		FOSA		MeFOSAA
Site	ng/L	stdev	ng/L	stdev	ng/L	stdev	ng/L	stdev	ng/L	stdev	ng/L	stdev	ng/L	stdev	ng/L	stdev	ng/L	stdev	ng/L	stdev	ng/L	stdev	ng/L	stdev	ng/L	stdev	ng/L	stdev	ng/L	stdev	ng/L	stdev	ng/L	stdev	ng/L	stdev	ng/L	stdev	ng/L	stdev	ng/L	stdev	ng/L	stdev	ng/L	stdev	ng/L	stdev	ng/L
KY 1	ND	NA	2.90371	0.00762014	ND	NA	ND	NA	2.55197	0.934295	ND	NA	ND	NA	ND	NA	ND	NA	ND	NA	ND	NA	ND	NA	ND	NA	ND	NA	ND	NA	9.68472	NA	ND	NA	ND	NA	ND	NA	ND	NA	ND	NA	ND	NA	ND	NA	ND	NA	ND
KY 2	ND	NA	3.47579	1.33805	ND	NA	ND	NA	ND	NA	ND	NA	ND	NA	ND	NA	ND	NA	ND	NA	ND	NA	ND	NA	ND	NA	ND	NA	ND	NA	5.41661	NA	ND	NA	ND	NA	ND	NA	ND	NA	ND	NA	ND	NA	ND	NA	ND	NA	ND
KY 3	8.87611	0.665128	6.96762	1.4607	5.54647	3.10395	6.20017	2.67918	8.38871	3.53038	ND	NA	ND	NA	ND	NA	ND	NA	ND	NA	ND	NA	ND	NA	ND	NA	ND	NA	ND	NA	14.8503	2.5653	ND	NA	ND	NA	ND	NA	ND	NA	ND	NA	ND	NA	ND	NA	ND	NA	ND
KY 4	2.95342	4.17677	6.70925	1.60553	3.80685	0.770403	3.90151	0.299104	7.95977	0.926841	ND	NA	ND	NA	ND	NA	ND	NA	ND	NA	ND	NA	ND	NA	ND	NA	ND	NA	ND	NA	11.4453	1.53566	ND	NA	ND	NA	ND	NA	ND	NA	ND	NA	ND	NA	ND	NA	ND	NA	ND
KY 5	ND	NA	6.03057	1.47098	ND	NA	ND	NA	ND	NA	ND	NA	ND	NA	ND	NA	ND	NA	ND	NA	ND	NA	ND	NA	ND	NA	ND	NA	ND	NA	ND	NA	ND	NA	ND	NA	ND	NA	ND	NA	ND	NA	ND	NA	ND	NA	ND	NA	ND
KY 6	11.9798	0.668991	6.0327	2.29018	4.12894	0.0396754	2.32965	0.480969	7.42198	0.0238922	ND	NA	ND	NA	ND	NA	ND	NA	ND	NA	ND	NA	1.83314	2.59245	ND	NA	ND	NA	ND	NA	18.4771	0.691378	ND	NA	ND	NA	ND	NA	ND	NA	ND	NA	ND	NA	ND	NA	ND	NA	ND
KY 7	ND	NA	3.90003	0.170833	1.26	NA	ND	NA	1.98754	2.81081	ND	NA	ND	NA	ND	NA	ND	NA	ND	NA	ND	NA	ND	NA	ND	NA	ND	NA	ND	NA	ND	NA	ND	NA	ND	NA	ND	NA	ND	NA	ND	NA	ND	NA	ND	NA	ND	NA	ND
KY 8	7.43414	0.301835	5.11723	0.344856	4.58469	0.435702	2.45313	0.407715	10.1674	3.08234	ND	NA	1.25448	0.0715939	ND	NA	ND	NA	ND	NA	ND	NA	6.90008	3.96888	ND	NA	ND	NA	ND	NA	13.4279	1.91291	ND	NA	ND	NA	ND	NA	ND	NA	ND	NA	7.93686	0.694446	ND	NA	ND	NA	ND
KY 9	11.1829	0.775858	6.3885	0.742989	4.41193	3.00248	3.34893	0.77574	7.76637	0.98387	ND	NA	ND	NA	ND	NA	ND	NA	ND	NA	ND	NA	ND	NA	ND	NA	6.6	NA	ND	NA	18.8959	1.91486	ND	NA	ND	NA	ND	NA	ND	NA	ND	NA	ND	NA	ND	NA	ND	NA	ND
KY 10	8.5363	0.88501	4.62506	1.74945	4.51287	1.12946	4.09495	0.809535	6.78419	0.587162	ND	NA	ND	NA	ND	NA	ND	NA	ND	NA	ND	NA	ND	NA	ND	NA	ND	NA	ND	NA	18.8457	3.41207	ND	NA	ND	NA	ND	NA	ND	NA	ND	NA	ND	NA	ND	NA	ND	NA	ND
KY 11	9.35152	1.76562	5.92705	0.893252	5.53065	0.389912	2.9479	0.445933	6.5705	1.37075	ND	NA	ND	NA	ND	NA	ND	NA	ND	NA	ND	NA	1.8	NA	ND	NA	ND	NA	ND	NA	13.6232	3.79285	ND	NA	ND	NA	ND	NA	ND	NA	ND	NA	ND	NA	ND	NA	ND	NA	ND
KY 12	9.05454	0.436807	5.49075	1.98244	6.32409	1.76023	3.21803	0.306587	6.90215	1.49417	ND	NA	ND	NA	ND	NA	ND	NA	ND	NA	ND	NA	3.11774	1.10238	ND	NA	5.79365	1.59008	ND	NA	16.2574	1.81233	ND	NA	ND	NA	ND	NA	ND	NA	ND	NA	ND	NA	ND	NA	ND	NA	ND
KY 13	7.38204	0.504544	2.72694	1.09558	5.18127	0.649408	4.12618	0.577793	9.31935	1.91542	1.99349	0.24	ND	NA	ND	NA	ND	NA	ND	NA	ND	NA	3.53317	0.621463	ND	NA	ND	NA	ND	NA	19.6806	6.23374	ND	NA	ND	NA	1.942	0.294911	ND	NA	ND	NA	ND	NA	ND	NA	ND	NA	ND
KY 14	10.5724	1.53701	5.93384	0.1197	4.96056	0.797051	3.11511	0.420192	7.97679	0.770871	13.9011	1.98832	ND	NA	ND	NA	ND	NA	ND	NA	ND	NA	ND	NA	ND	NA	ND	NA	ND	NA	12.466	0.360062	ND	NA	ND	NA	ND	NA	ND	NA	ND	NA	ND	NA	ND	NA	ND	NA	ND
KY 15	9.28538	1.30187	1.11438	0.858152	3.92787	1.18952	2.92689	0.495703	7.42321	0.990224	ND	NA	ND	NA	ND	NA	ND	NA	ND	NA	ND	NA	2.92518	0.0929194	ND	NA	2.67032	3.7764	ND	NA	12.2528	0.97461	ND	NA	ND	NA	1.72735	0.210977	ND	NA	ND	NA	ND	NA	ND	NA	ND	NA	ND
KY 16	9.6936	0.553271	5.63665	1.08057	5.23047	0.270331	2.71873	1.39969	6.82888	1.49597	ND	NA	ND	NA	ND	NA	ND	NA	ND	NA	ND	NA	ND	NA	ND	NA	ND	NA	ND	NA	16.1993	1.35498	ND	NA	ND	NA	ND	NA	ND	NA	ND	NA	ND	NA	ND	NA	ND	NA	ND
KY 17	ND	NA	6.38371	1.34062	2.57926	0.67262	ND	NA	5.06904	2.0546	ND	NA	ND	NA	ND	NA	ND	NA	ND	NA	ND	NA	ND	NA	ND	NA	ND	NA	ND	NA	ND	NA	ND	NA	ND	NA	ND	NA	ND	NA	ND	NA	ND	NA	ND	NA	ND	NA	ND
KY 18	ND	NA	7.33057	0.945218	2.94302	0.331949	2.82249	0.83218	4.07388	0.5926	ND	NA	ND	NA	ND	NA	ND	NA	ND	NA	ND	NA	ND	NA	11.4521	1.21717	ND	NA	ND	NA	ND	NA	ND	NA	ND	NA	ND	NA	ND	NA	ND	NA	ND	NA	ND	NA	ND	NA	ND
KY 19	ND	NA	4.87695	0.611991	2.48649	0.681903	2.45499	0.313341	3.64983	0.0863519	ND	NA	ND	NA	ND	NA	ND	NA	ND	NA	ND	NA	ND	NA	ND	NA	ND	NA	ND	NA	3.32497	4.70222	ND	NA	ND	NA	2.58698	0.439327	ND	NA	ND	NA	ND	NA	ND	NA	ND	NA	ND
KY 20	ND	NA	5.52441	1.16063	2.42579	0.833543	ND	NA	3.78498	0.279085	ND	NA	ND	NA	ND	NA	ND	NA	ND	NA	ND	NA	ND	NA	ND	NA	ND	NA	ND	NA	ND	NA	ND	NA	ND	NA	ND	NA	ND	NA	ND	NA	ND	NA	ND	NA	ND	NA	ND
KY 21	ND	NA	5.63422	0.604305	4.0601	1.25566	ND	NA	5.00764	0.552367	ND	NA	ND	NA	ND	NA	ND	NA	ND	NA	ND	NA	ND	NA	ND	NA	ND	NA	ND	NA	ND	NA	ND	NA	ND	NA	2.6921	0.163828	ND	NA	ND	NA	ND	NA	ND	NA	ND	NA	ND
KY 22	ND	NA	4.47903	0.913515	2.76977	0.700018	ND	NA	2.98333	NA	ND	NA	ND	NA	ND	NA	ND	NA	ND	NA	ND	NA	ND	NA	ND	NA	ND	NA	ND	NA	ND	NA	ND	NA	ND	NA	ND	NA	ND	NA	ND	NA	ND	NA	ND	NA	ND	NA	ND
KY 31	ND	NA	4.59683	1.34755	1.45773	0.150499	ND	NA	3.77023	0.284472	ND	NA	ND	NA	ND	NA	ND	NA	ND	NA	ND	NA	ND	NA	ND	NA	ND	NA	ND	NA	ND	NA	ND	NA	ND	NA	ND	NA	ND	NA	ND	NA	ND	NA	ND	NA	ND	NA	ND
KY 32	ND	NA	1.91353	2.70614	ND	NA	ND	NA	1.37519	1.94481	ND	NA	ND	NA	ND	NA	ND	NA	ND	NA	ND	NA	ND	NA	ND	NA	ND	NA	ND	NA	ND	NA	ND	NA	ND	NA	ND	NA	ND	NA	ND	NA	ND	NA	ND	NA	ND	NA	ND
Field Blank	ND	NA	ND	NA	ND	NA	ND	NA	ND	NA	ND	NA	ND	NA	ND	NA	ND	NA	ND	NA	ND	NA	ND	NA	ND	NA	ND	NA	ND	NA	ND	NA	ND	NA	ND	NA	ND	NA	NA	NA	NA	NA	ND	NA	ND	NA	ND	NA	ND
	a.	Analyte data provided by Duke University because standard was not available in TTU's lab at the time of sample analysis
[truncated: 19 more columns]

## Sheet: Data S5
Data S5. Concentrations of PFAS measured in sediment (KY 12-13, KY20, KY30) and soil (KY 27-29) near Paducah, KY and Louisville, KY (KY 20 only) during the September 2022 sampling event. PFAS from Table S1 that are not shown here were not detected in any project field sample.
	PFBA		PFPeA		PFHxA		PFHpA		PFOA		PFNA		PFDA		PFUnA		PFDoA		PFTrA		PFTeDA		PFBS		PFPeS		PFHxS		PFHpS		PFOS		PFNS		PFDS		bis-FMeSI		bis-FEtSI		bis-FBSI		FBSA		FHxSA		FOSA		MeFOSAA
Site	ng/kg	stdev	ng/kg	stdev	ng/kg	stdev	ng/kg	stdev	ng/kg	stdev	ng/kg	stdev	ng/kg	stdev	ng/kg	stdev	ng/kg	stdev	ng/kg	stdev	ng/kg	stdev	ng/kg	stdev	ng/kg	stdev	ng/kg	stdev	ng/kg	stdev	ng/kg	stdev	ng/kg	stdev	ng/kg	stdev	ng/kg	stdev	ng/kg	stdev	ng/kg	stdev	ng/kg	stdev	ng/kg	stdev	ng/kg	stdev	ng/kg
KY 12_sed	767.049	525.262	ND	NA	ND	NA	ND	NA	ND	NA	35000	1680	501.645	42.9669	12200	3130	295.464	61.7975	11700	3771.17	188.749	45.7197	326.912	21.4739	ND	NA	ND	NA	205.926	59.1487	6920	2060	ND	NA	ND	NA	ND	NA	ND	NA	233.788	8.8272	ND	NA	ND	NA	ND	NA	444.036
KY 13_sed	783.002	651.129	181.245	132.077	ND	NA	ND	NA	ND	NA	1920	960.761	73.9417	37.8764	1249.83	724.311	ND	NA	1310	1273.99	ND	NA	ND	NA	ND	NA	84.2424	17.9264	ND	NA	647.78	77.3913	ND	NA	ND	NA	316.503	181.699	ND	NA	ND	NA	ND	NA	ND	NA	ND	NA	151.957
KY 20_sed	352.013	235.622	ND	NA	ND	NA	ND	NA	ND	NA	ND	NA	88.5361	47.633	185.785	8.39171	135.449	13.4211	ND	NA	ND	NA	ND	NA	ND	NA	ND	NA	ND	NA	1190.1	627.91	ND	NA	ND	NA	216.989	143.216	ND	NA	ND	NA	ND	NA	ND	NA	ND	NA	ND
KY 23	3640	479.19	7840	1590	2630	1120	1900	334.126	2320	278.968	308000	31140	ND	NA	1380000	98200	207000	18200	1840000	275000	ND	NA	ND	NA	ND	NA	ND	NA	ND	NA	24900	28.2094	ND	NA	ND	NA	ND	NA	ND	NA	ND	NA	ND	NA	ND	NA	ND	NA	ND
KY 24	ND	NA	157.082	96.1681	ND	NA	36.9496	6.95756	ND	NA	3360	329.549	321.373	38.7071	54400	13500	4800	482.91	641000	108000	2120	137.217	12300	1480	ND	NA	ND	NA	ND	NA	ND	NA	ND	NA	ND	NA	ND	NA	ND	NA	ND	NA	ND	NA	ND	NA	ND	NA	ND
KY 25	473.579	65.88	181.91	13.2067	ND	NA	218.05	89.8175	ND	NA	46400	1020	4460	301.971	383000	29300	304.99	NA	144000	45000	493.054	53.4818	784.174	181.524	ND	NA	ND	NA	2530	704.917	ND	NA	ND	NA	ND	NA	284.189	108.941	ND	NA	ND	NA	ND	NA	ND	NA	ND	NA	ND
KY 26	1170	13.7784	1490	248.567	824.377	119.047	902.597	130.31	ND	NA	15300	2600	1640	113.945	153000	9400	1600	327.135	79000	5720	618.77	27.5881	ND	NA	ND	NA	621.64	113.96	ND	NA	10000	1590	ND	NA	ND	NA	845.689	31.2532	ND	NA	114.999	22.9575	ND	NA	ND	NA	ND	NA	ND
KY 27	668.899	208.672	ND	NA	39.8918	18.9433	186.26	33.7648	ND	NA	46200	3854.05	2640	219.824	419000	21800	2100	722.04	296000	16300	361.198	1.86719	276.377	60.7345	ND	NA	ND	NA	1870	7.5938	1030	42.9074	ND	NA	ND	NA	172.298	15.6776	ND	NA	ND	NA	ND	NA	ND	NA	ND	NA	ND
KY 28	1120	52.2396	385.09	13.6613	ND	NA	298.952	142.174	ND	NA	75600	12300	3570	930.74	385000	40100	8530	436.839	593000	67900	935.531	304.658	ND	NA	ND	NA	571.514	357.801	1280	258.283	679.146	228.023	ND	NA	ND	NA	155.631	41.2713	ND	NA	ND	NA	ND	NA	ND	NA	ND	NA	ND
KY 29	932.192	268.498	192.08	50.5372	117.318	47.2259	334.398	15.0944	ND	NA	10200	549.716	2060	73.6056	214000	3640	1900	10.4008	173000	123000	ND	NA	499.799	244.712	ND	NA	541.402	458.501	323.297	82.303	10100	3340	ND	NA	ND	NA	161.635	23.573	ND	NA	575.161	59.0967	ND	NA	ND	NA	ND	NA	519.312
KY 30_sed	260.533	19.8271	ND	NA	ND	NA	ND	NA	ND	NA	1390	301.766	77.9222	43.2975	360.526	4.25423	ND	NA	ND	NA	ND	NA	ND	NA	ND	NA	ND	NA	ND	NA	841.839	91.6276	ND	NA	ND	NA	83.4404	35.3274	ND	NA	64.0224	12.337	ND	NA	ND	NA	ND	NA	ND
KY 30_soil	223.422	NA	98.3509	NA	ND	NA	54.4862	NA	ND	NA	1790	NA	349.941	NA	14100	NA	264.83	NA	4190	NA	ND	NA	ND	NA	ND	NA	79.5429	NA	ND	NA	3980	NA	ND	NA	ND	NA	630.414	NA	ND	NA	1130	NA	ND	NA	ND	NA	ND	NA	224.369
	a.	Analyte not included in soil or sediment extract analysis.
[truncated: 19 more columns]

## Sheet: Data S6
Data S6. Concentrations of PFAS measured in surface water samples near Antwerp (EU 1 -17) and Salindres (EU 24 - 26) during the September 2022 sampling event.PFAS from Table S1 that are not shown here were not detected in any project field sample.
	PFBA		PFPeA		PFHxA		PFHpA		PFOAa		PFNA		PFDA		PFUnA		PFDoA		PFTrA		PFTeDA		PFBS		PFPeS		PFHxS		PFHpS		PFOS		PFNS		PFDS		bis-FMeSI		bis-FEtSI		bis-FBSI		FBSA		FHxSA		FOSA		MeFOSAA
Site	ng/L	stdev	ng/L	stdev	ng/L	stdev	ng/L	stdev	ng/L	stdev	ng/L	stdev	ng/L	stdev	ng/L	stdev	ng/L	stdev	ng/L	stdev	ng/L	stdev	ng/L	stdev	ng/L	stdev	ng/L	stdev	ng/L	stdev	ng/L	stdev	ng/L	stdev	ng/L	stdev	ng/L	stdev	ng/L	stdev	ng/L	stdev	ng/L	stdev	ng/L	stdev	ng/L	stdev	ng/L
EU 1	8.50425	4.87965	8.79008	1.43706	9.11532	0.297803	4.6907	1.13384	5.18067	0.33427	ND	NA	ND	NA	ND	NA	ND	NA	ND	NA	ND	NA	12.3553	2.53247	ND	NA	ND	NA	ND	NA	5.81251	0.601452	ND	NA	ND	NA	1.59413	0.233329	ND	NA	ND	NA	ND	NA	ND	NA	ND	NA	ND
EU 2	12.4967	5.40548	5.73626	1.74789	8.99134	0.138877	5.38373	0.0106446	8.79033	1.46318	ND	NA	ND	NA	ND	NA	ND	NA	ND	NA	ND	NA	10.6975	2.30176	ND	NA	7.83714	2.12263	ND	NA	11.8813	0.803339	ND	NA	ND	NA	ND	NA	ND	NA	ND	NA	ND	NA	ND	NA	ND	NA	ND
EU 3	13.4833	1.76526	8.56754	0.940097	7.68783	1.02333	4.30846	1.76948	6.69967	2.45991	ND	NA	ND	NA	ND	NA	ND	NA	ND	NA	ND	NA	9.04918	1.43736	ND	NA	6.33737	2.7966	ND	NA	9.71136	1.59808	ND	NA	ND	NA	ND	NA	ND	NA	ND	NA	ND	NA	ND	NA	ND	NA	ND
EU 4	13.1584	0.0874192	14.9556	1.32168	12.645	1.73431	3.95996	2.3649	7.85433	1.3485	1.54276	0.475247	1.40622	0.171593	ND	NA	ND	NA	ND	NA	ND	NA	8.30175	3.02939	ND	NA	6.8455	0.104642	ND	NA	5.01918	0.820359	ND	NA	ND	NA	1.07802	0.692371	ND	NA	7.51874	NA	9.45416	0.626601	ND	NA	ND	NA	ND
EU 5	11.4246	4.92335	14.3363	0.41071	14.7251	2.32116	7.805	0.436037	8.30867	1.96631	ND	NA	ND	NA	ND	NA	ND	NA	ND	NA	ND	NA	11.7118	0.302988	ND	NA	7.59545	0.344087	ND	NA	6.71073	1.83211	ND	NA	ND	NA	2.25785	NA	ND	NA	ND	NA	ND	NA	ND	NA	3.99907	0.205867	ND
EU 6	8.54857	2.63321	12.3638	0.230691	13.3511	3.05953	6.61812	0.797392	6.96233	0.672949	1.35394	0.312765	ND	NA	ND	NA	ND	NA	ND	NA	ND	NA	10.9833	1.42048	ND	NA	6.02808	2.10949	ND	NA	10.8812	0.30392	1.71356	0.433564	ND	NA	4.07194	0.140327	ND	NA	ND	NA	6.64478	1.22944	ND	NA	2.83499	0.0327845	ND
EU 7	6.81104	0.207589	7.98742	1.91803	9.31527	1.07047	5.46034	1.49057	8.63133	1.59362	7.45395	0.0108489	ND	NA	ND	NA	ND	NA	ND	NA	ND	NA	10.2438	1.74837	ND	NA	8.25681	0.312482	ND	NA	10.5064	3.68544	ND	NA	ND	NA	ND	NA	ND	NA	ND	NA	ND	NA	ND	NA	4.13636	0.552243	ND
EU 8	9.74728	2.5224	8.53962	1.6868	11.0107	0.470041	7.00547	2.08246	10.249	1.15008	ND	NA	ND	NA	ND	NA	ND	NA	ND	NA	ND	NA	13.5785	0.682736	ND	NA	8.17733	0.322154	ND	NA	9.96095	0.202666	ND	NA	ND	NA	ND	NA	ND	NA	ND	NA	ND	NA	ND	NA	ND	NA	ND
EU 9	7.62972	0.549364	11.7494	0.419952	11.787	0.820866	6.8334	0.30517	8.91467	0.318177	ND	NA	ND	NA	ND	NA	ND	NA	ND	NA	ND	NA	10.9681	2.48637	ND	NA	9.76618	2.65932	ND	NA	7.06038	0.354008	ND	NA	ND	NA	1.73268	NA	ND	NA	ND	NA	ND	NA	ND	NA	4.48115	1.36081	ND
EU 9 dup	4.89581	1.63719	8.75475	2.75255	13.2248	0.518306	6.85396	0.529129	9.83767	0.349503	ND	NA	ND	NA	ND	NA	ND	NA	ND	NA	ND	NA	7.93227	0.206445	ND	NA	10.1845	2.4039	ND	NA	13.3669	0.269151	ND	NA	ND	NA	1.07116	NA	ND	NA	ND	NA	10.6823	0.817827	ND	NA	3.74798	0.600957	ND
EU 10	7.09361	2.082	9.60294	1.09224	10.7782	1.7518	4.68578	0.531199	9.90667	1.85827	ND	NA	ND	NA	ND	NA	ND	NA	ND	NA	ND	NA	10.1458	0.604752	ND	NA	8.27095	0.947735	ND	NA	12.5432	0.604428	ND	NA	ND	NA	1.74149	NA	ND	NA	ND	NA	ND	NA	ND	NA	4.1104	0.295394	ND
EU 10 dup	7.81951	1.92715	7.72711	0.830037	11.0094	1.13053	3.80687	1.2792	9.854	0.825116	ND	NA	ND	NA	ND	NA	ND	NA	ND	NA	ND	NA	6.50181	9.19495	ND	NA	7.7296	1.65837	ND	NA	11.745	0.08773	ND	NA	ND	NA	1	NA	ND	NA	ND	NA	ND	NA	ND	NA	ND	NA	ND
EU 11	8.23805	1.36083	9.7573	1.02123	13.558	2.3887	6.33946	1.13471	7.543	1.82641	ND	NA	ND	NA	ND	NA	ND	NA	ND	NA	ND	NA	9.91186	0.0233354	ND	NA	11.9174	5.8354	ND	NA	8.05825	1.18829	ND	NA	ND	NA	ND	NA	ND	NA	ND	NA	ND	NA	ND	NA	ND	NA	ND
EU 12	7.95127	2.34837	10.0508	0.952932	11.5538	0.0145673	5.76002	1.68753	7.49633	2.11632	ND	NA	ND	NA	ND	NA	ND	NA	ND	NA	ND	NA	9.05662	0.100852	ND	NA	5.53569	2.65391	ND	NA	7.76316	0.760582	ND	NA	ND	NA	ND	NA	ND	NA	ND	NA	ND	NA	ND	NA	ND	NA	ND
EU 13	6.76651	1.84793	7.54715	0.701815	11.6477	0.155728	5.48344	1.13016	8.848	0.570017	ND	NA	ND	NA	ND	NA	ND	NA	ND	NA	ND	NA	10.1878	1.56217	ND	NA	7.11591	1.04291	ND	NA	7.41212	0.48975	ND	NA	ND	NA	ND	NA	ND	NA	ND	NA	ND	NA	ND	NA	ND	NA	ND
EU 16	3386.83	111.451	252.524	14.6794	314.016	9.68048	83.0806	9.59177	474.957	21.975	5.61278	1.48056	ND	NA	ND	NA	ND	NA	ND	NA	ND	NA	2454.77	44.3873	93.5988	4.98486	320.976	6.81186	33.6441	1.74833	203.846	9.8081	ND	NA	ND	NA	10.8109	0.395152	6.44461	0.847962	ND	NA	3478.58	288.823	23.6291	6.28378	11.6606	2.36678	7.37782
EU 17	40700	1124.6	36700	3778.5	94000	10440	40800	5277.25	68200	2811.4	346.141	0.94086	76.2928	7.97169	7.42901	0.0489427	ND	NA	ND	NA	ND	NA	20900	269.451	10700	466.844	91700	667.817	9027.02	451.182	145000	7850.08	538.828	28.0437	ND	NA	81.8904	0.982303	65.684	11.9081	ND	NA	3519.65	148.552	12100	394.832	354.214	1.28651	92.6794
EU 20	1.23769	1.75036	9.92658	0.805302	6.7448	0.426542	4.3906	0.581179	ND	NA	ND	NA	ND	NA	ND	NA	ND	NA	ND	NA	ND	NA	6.18182	0.667148	ND	NA	6.97381	0.157287	ND	NA	ND	NA	ND	NA	ND	NA	ND	NA	ND	NA	ND	NA	ND	NA	ND	NA	ND	NA	ND
EU 21	ND	NA	3.01553	0.1707	2.12651	0.319318	ND	NA	ND	NA	ND	NA	ND	NA	ND	NA	ND	NA	ND	NA	ND	NA	ND	NA	ND	NA	2.87995	4.07286	ND	NA	ND	NA	2.60941	1.29985	ND	NA	ND	NA	ND	NA	ND	NA	ND	NA	ND	NA	ND	NA	ND
EU 22	ND	NA	3.53691	NA	3.0009	NA	1.53846	NA	3.59167	0.311747	ND	NA	ND	NA	ND	NA	ND	NA	ND	NA	ND	NA	ND	NA	ND	NA	10.0712	NA	ND	NA	18.5711	NA	ND	NA	ND	NA	ND	NA	ND	NA	ND	NA	ND	NA	ND	NA	ND	NA	ND
EU 23	7.00906	1.02929	30.0083	0.865093	13.7281	0.51706	7.60147	0.222441	5.07233	0.0130512	ND	NA	ND	NA	ND	NA	ND	NA	ND	NA	ND	NA	3.08998	0.315783	ND	NA	8.57245	0.629959	ND	NA	9.25892	1.25181	ND	NA	ND	NA	ND	NA	ND	NA	ND	NA	ND	NA	ND	NA	ND	NA	ND
EU 24	13.532	0.747147	50.4482	2.37801	34.5156	3.38074	12.4158	1.52562	12.4677	0.501271	ND	NA	ND	NA	ND	NA	ND	NA	ND	NA	ND	NA	4.58189	0.610685	ND	NA	6.40833	1.57403	ND	NA	13.148	1.65538	ND	NA	ND	NA	4.36256	0.175911	ND	NA	ND	NA	ND	NA	ND	NA	ND	NA	ND
EU 25	9.29182	0.568306	65.2976	0.271803	26.9262	0.918975	13.4178	0.613694	8.74667	1.09056	1.40612	0.0740126	1.10254	0.0242829	ND	NA	ND	NA	ND	NA	ND	NA	5.37163	2.67638	ND	NA	12.5804	0.16211	ND	NA	14.2926	1.61208	ND	NA	ND	NA	6.55317	0.204566	ND	NA	ND	NA	ND	NA	ND	NA	2.51453	0.283486	ND
EU 26	ND	NA	4.7673	0.624139	3.31795	0.40017	1.48676	0.549917	2.97633	0.334844	7.23718	0.065572	ND	NA	ND	NA	ND	NA	ND	NA	ND	NA	2.91489	4.12227	ND	NA	4.02185	1.16796	ND	NA	5.7023	1.56503	ND	NA	ND	NA	ND	NA	ND	NA	ND	NA	ND	NA	ND	NA	ND	NA	ND
Field Blank	ND	NA	ND	NA	ND	NA	ND	NA	ND	NA	ND	NA	ND	NA	ND	NA	ND	NA	ND	NA	ND	NA	ND	NA	ND	NA	ND	NA	ND	NA	ND	NA	ND	NA	ND	NA	ND	NA	NA	NA	NA	NA	ND	NA	ND	NA	ND	NA	ND
	a.	As a result of high background concentrations in TTU's PFOA blank, Duke provided data for this analyte.
	b.	Analyte data provided by Duke University because standard was not available in TTU's lab at the time of sample analysis
[truncated: 19 more columns]

## Sheet: Data S7
Data S7. Concentrations of PFAS measured in sediment (denoted "sed") in Antwerp, Belgium (EU 1 - EU 19) and Salindres, France (EU 20 - EU 25) during the October 2022 sampling event. PFAS from Table S1 that are not shown here were not detected in any project field sample.
	PFBA		PFPeA		PFHxA		PFHpA		PFOA		PFNA		PFDA		PFUnA		PFDoA		PFTrA		PFTeDA		PFBS		PFPeS		PFHxS		PFHpS		PFOS		PFNS		PFDS		bis-FMeSI		bis-FESI		bis-FBSI		FBSA		FHxSA		FOSA		MeFOSAA
Site	ng/kg	stdev	ng/kg	stdev	ng/kg	stdev	ng/kg	stdev	ng/kg	stdev	ng/kg	stdev	ng/kg	stdev	ng/kg	stdev	ng/kg	stdev	ng/kg	stdev	ng/kg	stdev	ng/kg	stdev	ng/kg	stdev	ng/kg	stdev	ng/kg	stdev	ng/kg	stdev	ng/kg	stdev	ng/kg	stdev	ng/kg	stdev	ng/kg	stdev	ng/kg	stdev	ng/kg	stdev	ng/kg	stdev	ng/kg	stdev	ng/kg
EU 1_sed	ND	NA	10.6453	NA	26.9844	NA	9.88212	NA	ND	NA	9.62279	0.722165	17.2122	5.04909	15.5434	1.59238	25.9593	0.112318	17.1659	NA	27.763	1.14585	ND	NA	ND	NA	ND	NA	ND	NA	74.4529	2.40258	22.0392	NA	ND	NA	ND	NA	ND	NA	ND	NA	ND	NA	ND	NA	38.1218	NA	23.0156
EU 9_sed	ND	NA	ND	NA	96.553	9.99324	39.8788	10.9813	ND	NA	50.4346	18.6547	94.0089	5.63793	80.8368	8.50882	116.025	3.13726	77.2061	6.62449	108.464	6.21923	ND	NA	ND	NA	ND	NA	ND	NA	996.154	175.678	381.999	86.313	ND	NA	50.6945	5.85363	64.5613	4.51822	ND	NA	ND	NA	ND	NA	174.355	0.94747	103.598
EU 10_sed	ND	NA	ND	NA	102.198	2.94749	33.7699	1.26773	91.7371	16.5377	37.3636	0.945792	69.6657	0.453871	73.8692	3.04148	110.171	16.9808	77.484	0.920131	112.768	10.4101	ND	NA	ND	NA	240.964	74.7486	ND	NA	560.985	45.9845	582.266	233.967	ND	NA	27.7095	11.6162	ND	NA	73.6989	25.2177	ND	NA	ND	NA	ND	NA	95.5862
EU 14	239.065	0.00930901	98.8254	58.4302	58.5506	22.2454	21.1256	0.442651	271.378	135.932	21.0472	4.67545	58.1239	4.41526	85.3767	7.4276	89.4322	0.244435	59.7103	3.33829	77.1021	1.93992	48.4721	9.86549	ND	NA	ND	NA	ND	NA	1098.33	208.806	35.7537	0.498911	ND	NA	ND	NA	53.6587	21.9451	98.0959	15.4433	ND	NA	ND	NA	ND	NA	ND
EU 15	1854.67	166.481	921.083	47.9779	454.32	49.5357	361.378	55.7762	7883.62	21.5936	415.014	32.188	166.707	15.5547	297.838	11.2313	510.209	43.3636	267.521	2.29715	223.555	13.0921	495.081	36.3013	ND	NA	469.45	47.8032	ND	NA	164000	8238.41	3411.4	861.468	5367.99	1301.28	14.7329	3.05781	48.7406	3.81482	586.113	280.004	1060.32	253.933	941.573	408.674	50400	14500	2165.37
EU 16	3580.65	5.77646	627.317	53.7411	407.015	5.54802	165.067	12.1189	1751.81	189.346	102.702	4.15163	103.89	7.23775	170.164	21.8714	148.456	20.0598	73.6078	0.856979	108.277	4.97458	3673.24	153.741	ND	NA	1004.1	88.731	373.84	36.5164	40900	199.149	334.214	48.0695	ND	NA	11.9537	8.76927	56.0482	4.34099	131.775	22.7219	1014.5	152.591	ND	NA	4457.18	176.324	2815.12
EU 17_sed	4630000	2440000	3830000	2810000	3600000	920000	3680000	1930000	4240000	2250000	58000	3811.12	54000	7020.42	3637.84	920.205	3597	191.008	2116.68	190.608	3559.59	14.2094	1350000	81200	738000	99600	6650000	881000	2520000	19900	23000000	3820000	377000	83600	ND	NA	1771.15	22.6974	3898.83	647.765	5076.34	621.373	29900	2909.12	414000	27000	144000	12700	83300
EU 18	260.594	0.983519	142.516	55.7398	138.504	4.45335	117.568	6.86939	307.499	125.75	193.866	19.5961	515.412	28.7599	242.91	7.44777	255.437	12.0261	104.968	11.7359	216.707	0.497753	319.566	3.52453	ND	NA	ND	NA	217.781	42.0072	5982.36	75.7339	ND	NA	ND	NA	17.1592	12.2905	ND	NA	69.4422	17.2888	420.45	0.826256	ND	NA	199.707	13.5259	ND
EU 19	1024.11	187.205	185.898	11.3469	133.781	26.7816	111.586	28.1342	405.827	6.70181	115.546	18.9239	92.6313	0.600684	69.9884	11.7445	83.1166	2.39911	ND	NA	75.6734	5.02255	74.0099	0.304602	ND	NA	9.55787	1.10444	317.315	130.036	2127.88	46.2863	ND	NA	ND	NA	ND	NA	43.0073	7.22363	ND	NA	ND	NA	ND	NA	ND	NA	ND
EU 20_sed	329.135	52.243	670.768	22.2661	534.036	9.52359	422.066	24.737	201.974	77.0166	130.684	10.9444	421.434	38.6685	314.474	54.4466	614.45	16.6227	166.171	24.5756	289.617	41.1158	ND	NA	ND	NA	157.451	85.7519	180.156	1.73975	2181.01	8.34878	54.2093	8.07145	ND	NA	ND	NA	100.52	2.76071	ND	NA	ND	NA	ND	NA	ND	NA	ND
EU 20	884.928	NA	2454.22	NA	1163.87	NA	1139.1	NA	1806.33	216.973	1199.48	39.0126	4482.24	560.077	3485.56	432.554	1815.73	192.167	708.062	77.008	654.499	18.4167	ND	NA	ND	NA	ND	NA	ND	NA	13500	605.706	ND	NA	ND	NA	29.1996	13.816	58.2445	NA	165.828	NA	ND	NA	ND	NA	91.8023	NA	ND
EU 21_sed	52.8296	8.73377	116.941	21.8282	66.922	6.78519	32.6971	4.04733	ND	NA	45.6556	2.56203	41.5309	3.36127	41.3117	1.7525	62.8493	1.43853	42.8584	0.296914	76.957	4.02129	ND	NA	ND	NA	27.0982	11.1777	ND	NA	979.975	46.2813	ND	NA	ND	NA	ND	NA	ND	NA	52.036	28.4525	ND	NA	ND	NA	ND	NA	ND
EU 21	253.256	49.3429	120.731	22.0676	96.9948	2.6061	133.6	3.86407	107.729	37.3501	339.504	44.1188	205.207	37.5617	227.581	12.692	123.786	3.42898	92.0578	3.70156	100.38	12.134	ND	NA	ND	NA	ND	NA	ND	NA	696.497	51.1016	ND	NA	ND	NA	ND	NA	42.0564	6.61587	ND	NA	ND	NA	ND	NA	ND	NA	ND
EU 22_sed	ND	NA	ND	NA	1225.14	375.451	381.793	NA	2313.81	313.382	736.714	257.783	3779.58	321.064	1518.25	554.258	2753.52	246.853	1020.85	151.068	1844.92	130.24	ND	NA	ND	NA	ND	NA	ND	NA	40400	4748.68	ND	NA	4764.11	559.186	124.144	NA	ND	NA	3762.34	259.218	ND	NA	ND	NA	1309.63	NA	959.175
EU 22	117.729	27.8132	47.0937	21.5155	74.0231	3.4076	51.5092	11.7918	195.01	50.0336	47.924	3.61957	45.6565	0.746745	50.4728	8.40193	60.3449	2.0164	42.5868	0.566659	68.9302	1.67367	ND	NA	ND	NA	ND	NA	160.784	0.422227	201.688	51.8642	ND	NA	ND	NA	ND	NA	41.3532	2.13357	112.685	25.5921	ND	NA	ND	NA	ND	NA	ND
EU 24_sed	134.639	38.5176	438.601	16.7108	334.184	57.7404	150.835	0.584771	266.3	77.6279	180.351	18.7641	1463.79	4.31027	1240.2	79.9903	5361.21	216.904	740.375	50.0693	2864.41	223.687	ND	NA	ND	NA	ND	NA	ND	NA	2994.17	1247.05	ND	NA	ND	NA	394.212	11.0651	ND	NA	335.461	119.835	ND	NA	ND	NA	567.538	64.1318	851.63
EU 23_sed	64.6862	NA	48.0712	10.2162	59.0518	22.3122	18.1373	3.16447	ND	NA	20.4125	2.92707	32.7429	4.22545	22.8513	1.88836	55.3893	0.67546	ND	NA	55.2101	1.03375	ND	NA	ND	NA	ND	NA	ND	NA	398.829	42.2722	ND	NA	ND	NA	14.4095	10.9429	ND	NA	36.0021	1.3074	ND	NA	ND	NA	57.7112	1.64884	ND
EU 23	183.861	10.9889	100.234	15.5898	76.0788	5.07905	44.0724	3.84112	351.068	28.2378	65.5229	1.33873	50.4197	2.48576	55.5295	11.1049	58.81	1.85228	47.9235	1.93926	66.3901	0.471252	ND	NA	ND	NA	ND	NA	ND	NA	393.658	1.52113	14.6283	2.22443	ND	NA	27.6528	8.41467	ND	NA	58.0559	10.6248	ND	NA	ND	NA	247.884	117.946	ND
EU 25_sed	ND	NA	251.737	76.0369	52.2473	11.3331	18.9167	3.1174	ND	NA	31.9907	2.24938	53.1752	13.4163	42.9748	0.568294	81.8914	3.71422	ND	NA	84.9386	6.77493	ND	NA	ND	NA	13.0016	7.00535	ND	NA	1032.15	48.4398	ND	NA	ND	NA	52.0408	6.97186	47.2389	4.2849	113.867	17.1737	ND	NA	ND	NA	83.8136	10.0139	ND
EU 25	56.9149	9.92628	192.007	31.4651	55.0942	6.7397	80.9186	11.2659	164.4	63.8455	80.1638	0.24181	68.9935	1.62804	60.5442	10.0844	83.3595	1.00891	51.6706	3.20814	71.6466	6.73881	ND	NA	ND	NA	ND	NA	ND	NA	727.722	125.526	ND	NA	ND	NA	22.3666	10.6721	ND	NA	86.0947	17.2325	ND	NA	ND	NA	ND	NA	ND
	a.	Analyte not included in soil or sediment extract analysis.
	b.	The IS for GenX (HPFO-DA) was not available at the international lab where samples were processed.
[truncated: 19 more columns]
